# Supplementary material for: A Genetic Polymorphism in the WDR72 Gene is Associated With Calcium Nephrolithiasis in the Chinese Han Population
Source: Frontiers journal article supplement (doi:10.3389/fgene.2022.897051), 2022-07-14
Supplement: Data_Sheet_2.zip [file Data_Sheet_2.zip]

## Sheet: assoc_01_0.1
CHR	SNP	BP	A1	F_A	F_U	A2	CHISQ	P	OR	SE	L95	U95
1	rs10917002	21836340	T	0.2949	0.2971	C	0.01831	0.8924	0.9896	0.07745	0.8502	1.152
1	rs1256328	21896767	T	0.2171	0.1986	C	1.708	0.1912	1.119	0.08589	0.9454	1.324
2	rs780093	27742603	C	0.4566	0.4722	T	0.8026	0.3703	0.9392	0.07006	0.8187	1.077
2	rs13003198	234257105	T	0.4249	0.3903	C	3.695	0.05459	1.154	0.07457	0.9971	1.336
4	rs1481012	89039082	G	0.3307	0.307	A	2.119	0.1455	1.115	0.07509	0.9628	1.292
5	rs12654812	176794191	A	0.2981	0.2664	G	4.106	0.04273	1.17	0.07744	1.005	1.362
6	rs77648599	160624115	G	0.01059	0.01661	T	2.017	0.1555	0.6336	0.324	0.3357	1.196
7	rs12539707	27626165	T	0.07383	0.09795	C	5.609	0.01787	0.7341	0.1309	0.568	0.9488
7	rs12666466	30916430	G	0.08828	0.09524	C	0.4736	0.4913	0.9198	0.1214	0.725	1.167
11	rs4529910	111243102	G	0.4236	0.4273	T	0.04302	0.8357	0.9849	0.07325	0.8532	1.137
13	rs1037271	42779410	T	0.4182	0.4646	C	6.7	0.00964	0.8284	0.07275	0.7183	0.9554
15	rs578595	53997089	A	0.1261	0.1895	C	21.13	4.287e-06	0.617	0.1057	0.5016	0.7591
16	rs889299	23381914	A	0.3488	0.3661	G	1.058	0.3038	0.9274	0.07335	0.8032	1.071
17	rs4793434	70352537	G	0.3372	0.3428	C	0.1137	0.7359	0.9753	0.07408	0.8435	1.128
19	rs3760702	14588237	A	0.206	0.2139	G	0.2795	0.597	0.9536	0.08994	0.7995	1.137
21	rs12626330	37835982	G	0.4897	0.4418	C	7.045	0.00795	1.213	0.07272	1.052	1.399
22	rs13054904	23410918	A	0.03582	0.03785	T	0.09403	0.7591	0.9444	0.1867	0.655	1.362

## Sheet: missing01
	CHR	SNP	N_MISS	N_GENO	F_MISS
	1	rs10917002	33	1699	0.01942
	1	rs1256328	1	1699	0.0005886
	2	rs780093	1	1699	0.0005886
	2	rs13003198	131	1699	0.0771
	3	rs7627468	187	1699	0.1101
	4	rs1481012	16	1699	0.009417
	5	rs12654812	0	1699	0
	5	rs56235845	224	1699	0.1318
	6	rs1155347	775	1699	0.4562
	6	rs77648599	105	1699	0.0618
	7	rs12539707	137	1699	0.08064
	7	rs12666466	0	1699	0
	11	rs4529910	80	1699	0.04709
	13	rs1037271	88	1699	0.0518
	15	rs578595	132	1699	0.07769
	16	rs77924615	830	1699	0.4885
	16	rs889299	26	1699	0.0153
	17	rs1010269	243	1699	0.143
	17	rs4793434	22	1699	0.01295
	19	rs3760702	129	1699	0.07593
	20	rs17216707	915	1699	0.5386
	21	rs219780	1008	1699	0.5933
	21	rs199565725	1014	1699	0.5968
	21	rs12626330	113	1699	0.06651
	22	rs13054904	11	1699	0.006474

## Sheet: hardy01
	CHR	SNP	TEST	A1	A2	GENO	O(HET)	E(HET)	P
	1	rs10917002	ALL	T	C	142/703/821	0.422	0.4169	0.6388
	1	rs10917002	AFF	T	C	60/274/334	0.4102	0.4159	0.7105
	1	rs10917002	UNAFF	T	C	82/429/487	0.4299	0.4177	0.4043
	1	rs1256328	ALL	T	C	73/554/1071	0.3263	0.3273	0.8822
	1	rs1256328	AFF	T	C	33/234/424	0.3386	0.3399	0.911
	1	rs1256328	UNAFF	T	C	40/320/647	0.3178	0.3183	0.9214
	2	rs780093	ALL	C	T	370/842/486	0.4959	0.4977	0.8838
	2	rs780093	AFF	C	T	148/335/208	0.4848	0.4962	0.5404
	2	rs780093	UNAFF	C	T	222/507/278	0.5035	0.4985	0.8003
	2	rs13003198	ALL	T	C	282/702/584	0.4477	0.4815	0.005457
	2	rs13003198	AFF	T	C	123/269/214	0.4439	0.4887	0.02484
	2	rs13003198	UNAFF	T	C	159/433/370	0.4501	0.4759	0.09078
	3	rs7627468	ALL	G	A	344/770/398	0.5093	0.4994	0.4709
	3	rs7627468	AFF	G	A	125/294/164	0.5043	0.4978	0.803
	3	rs7627468	UNAFF	G	A	219/476/234	0.5124	0.4999	0.4706
	4	rs1481012	ALL	G	A	167/732/784	0.4349	0.4328	0.8659
	4	rs1481012	AFF	G	A	79/299/313	0.4327	0.4427	0.5482
	4	rs1481012	UNAFF	G	A	88/433/471	0.4365	0.4255	0.4556
	5	rs12654812	ALL	A	G	151/647/901	0.3808	0.4026	0.02587
	5	rs12654812	AFF	A	G	69/274/348	0.3965	0.4185	0.1728
	5	rs12654812	UNAFF	A	G	82/373/553	0.37	0.3908	0.09092
	5	rs56235845	ALL	G	T	71/464/940	0.3146	0.3264	0.1747
	5	rs56235845	AFF	G	T	28/213/387	0.3392	0.3366	0.906
	5	rs56235845	UNAFF	G	T	43/251/553	0.2963	0.3187	0.05153
	6	rs1155347	ALL	C	T	27/239/658	0.2587	0.2668	0.387
	6	rs1155347	AFF	C	T	0/0/0	nan	nan	NA
	6	rs1155347	UNAFF	C	T	27/239/658	0.2587	0.2668	0.387
	6	rs77648599	ALL	G	T	3/39/1552	0.02447	0.02783	0.003173
	6	rs77648599	AFF	G	T	1/12/648	0.01815	0.02096	0.06718
	6	rs77648599	UNAFF	G	T	2/27/904	0.02894	0.03267	0.02395
	7	rs12539707	ALL	T	C	5/263/1294	0.1684	0.1595	0.02556
	7	rs12539707	AFF	T	C	2/97/585	0.1418	0.1368	0.571
	7	rs12539707	UNAFF	T	C	3/166/709	0.1891	0.1767	0.03549
	7	rs12666466	ALL	G	C	18/278/1403	0.1636	0.1677	0.3101
	7	rs12666466	AFF	G	C	7/108/576	0.1563	0.161	0.4733
	7	rs12666466	UNAFF	G	C	11/170/827	0.1687	0.1723	0.4649
	11	rs4529910	ALL	G	T	298/783/538	0.4836	0.489	0.6843
	11	rs4529910	AFF	G	T	114/293/208	0.4764	0.4883	0.5633
	11	rs4529910	UNAFF	G	T	184/490/330	0.488	0.4894	0.9486
	13	rs1037271	ALL	T	C	325/788/498	0.4891	0.4942	0.6868
	13	rs1037271	AFF	T	C	115/302/219	0.4748	0.4866	0.5684
	13	rs1037271	UNAFF	T	C	210/486/279	0.4985	0.4975	1
	15	rs578595	ALL	A	C	41/439/1087	0.2802	0.2772	0.7163
	15	rs578595	AFF	A	C	8/129/438	0.2243	0.2204	0.8496
	15	rs578595	UNAFF	A	C	33/310/649	0.3125	0.3072	0.6791
	16	rs77924615	ALL	A	G	21/177/671	0.2037	0.2203	0.03064
	16	rs77924615	AFF	A	G	0/0/0	nan	nan	NA
	16	rs77924615	UNAFF	A	G	21/177/671	0.2037	0.2203	0.03064
	16	rs889299	ALL	A	G	230/741/702	0.4429	0.4602	0.1237
	16	rs889299	AFF	A	G	96/290/305	0.4197	0.4543	0.04481
	16	rs889299	UNAFF	A	G	134/451/397	0.4593	0.4641	0.7315
	17	rs1010269	ALL	A	G	223/646/587	0.4437	0.4688	0.04407
	17	rs1010269	AFF	A	G	79/281/238	0.4699	0.4647	0.8602
	17	rs1010269	UNAFF	A	G	144/365/349	0.4254	0.4715	0.004697
	17	rs4793434	ALL	G	C	207/728/742	0.4341	0.4491	0.1741
	17	rs4793434	AFF	G	C	77/312/302	0.4515	0.447	0.8648
	17	rs4793434	UNAFF	G	C	130/416/440	0.4219	0.4506	0.04778
	19	rs3760702	ALL	A	G	71/520/979	0.3312	0.3328	0.8794
	19	rs3760702	AFF	A	G	31/191/392	0.3111	0.3272	0.2184
	19	rs3760702	UNAFF	A	G	40/329/587	0.3441	0.3363	0.5023
	20	rs17216707	ALL	C	T	1/17/766	0.02168	0.02394	0.1045
	20	rs17216707	AFF	C	T	0/0/0	nan	nan	NA
	20	rs17216707	UNAFF	C	T	1/17/766	0.02168	0.02394	0.1045
	21	rs219780	ALL	A	G	0/1/690	0.001447	0.001446	1
	21	rs219780	AFF	A	G	0/1/690	0.001447	0.001446	1
	21	rs219780	UNAFF	A	G	0/0/0	nan	nan	NA
	21	rs199565725	ALL	0	AAC	0/0/685	0	0	1
	21	rs199565725	AFF	0	AAC	0/0/685	0	0	1
	21	rs199565725	UNAFF	0	AAC	0/0/0	nan	nan	NA
	21	rs12626330	ALL	G	C	346/770/470	0.4855	0.4969	0.3632
	21	rs12626330	AFF	G	C	155/310/168	0.4897	0.4998	0.6333
	21	rs12626330	UNAFF	G	C	191/460/302	0.4827	0.4932	0.5117
	22	rs13054904	ALL	A	T	2/121/1565	0.07168	0.07131	1
	22	rs13054904	AFF	A	T	0/49/635	0.07164	0.06907	1
	22	rs13054904	UNAFF	A	T	2/72/930	0.07171	0.07283	0.6491

## Sheet: noqc for 01
CHR	SNP	BP	A1	F_A	F_U	A2	CHISQ	P	OR	SE	L95	U95
1	rs10917002	21836340	T	0.2949	0.2971	C	0.01831	0.8924	0.9896	0.07745	0.8502	1.152
1	rs1256328	21896767	T	0.2171	0.1986	C	1.708	0.1912	1.119	0.08589	0.9454	1.324
2	rs780093	27742603	C	0.4566	0.4722	T	0.8026	0.3703	0.9392	0.07006	0.8187	1.077
2	rs13003198	234257105	T	0.4249	0.3903	C	3.695	0.05459	1.154	0.07457	0.9971	1.336
3	rs7627468	121946099	G	0.4666	0.4919	A	1.847	0.1741	0.9033	0.07483	0.7801	1.046
4	rs1481012	89039082	G	0.3307	0.307	A	2.119	0.1455	1.115	0.07509	0.9628	1.292
5	rs12654812	176794191	A	0.2981	0.2664	G	4.106	0.04273	1.17	0.07744	1.005	1.362
5	rs56235845	176798040	G	0.2142	0.1989	T	1.026	0.3112	1.097	0.09184	0.9167	1.314
6	rs1155347	39146230	C	NA	0.1585	T	0	1	NA	NA	NA	NA
6	rs77648599	160624115	G	0.01059	0.01661	T	2.017	0.1555	0.6336	0.324	0.3357	1.196
7	rs12539707	27626165	T	0.07383	0.09795	C	5.609	0.01787	0.7341	0.1309	0.568	0.9488
7	rs12666466	30916430	G	0.08828	0.09524	C	0.4736	0.4913	0.9198	0.1214	0.725	1.167
11	rs4529910	111243102	G	0.4236	0.4273	T	0.04302	0.8357	0.9849	0.07325	0.8532	1.137
13	rs1037271	42779410	T	0.4182	0.4646	C	6.7	0.00964	0.8284	0.07275	0.7183	0.9554
15	rs578595	53997089	A	0.1261	0.1895	C	21.13	4.287e-06	0.617	0.1057	0.5016	0.7591
16	rs77924615	20392332	A	NA	0.126	G	0	1	NA	NA	NA	NA
16	rs889299	23381914	A	0.3488	0.3661	G	1.058	0.3038	0.9274	0.07335	0.8032	1.071
17	rs1010269	59448945	A	0.3671	0.3805	G	0.5464	0.4598	0.944	0.07792	0.8103	1.1
17	rs4793434	70352537	G	0.3372	0.3428	C	0.1137	0.7359	0.9753	0.07408	0.8435	1.128
19	rs3760702	14588237	A	0.206	0.2139	G	0.2795	0.597	0.9536	0.08994	0.7995	1.137
20	rs17216707	52732362	C	NA	0.01212	T	0	1	NA	NA	NA	NA
21	rs219780	37833307	A	0.0007236	NA	G	0	1	NA	NA	NA	NA
21	rs199565725	37835238	0	0	NA	AAC	NA	NA	NA	NA	NA	NA
21	rs12626330	37835982	G	0.4897	0.4418	C	7.045	0.00795	1.213	0.07272	1.052	1.399
22	rs13054904	23410918	A	0.03582	0.03785	T	0.09403	0.7591	0.9444	0.1867	0.655	1.362
